# Supplementary material
Source: publisher figshare collection journal article supplement (https://gsajournals.figshare.com/ndownloader/files/17710712)
Supplement: Supplementary file 1 [file 17710712]

**
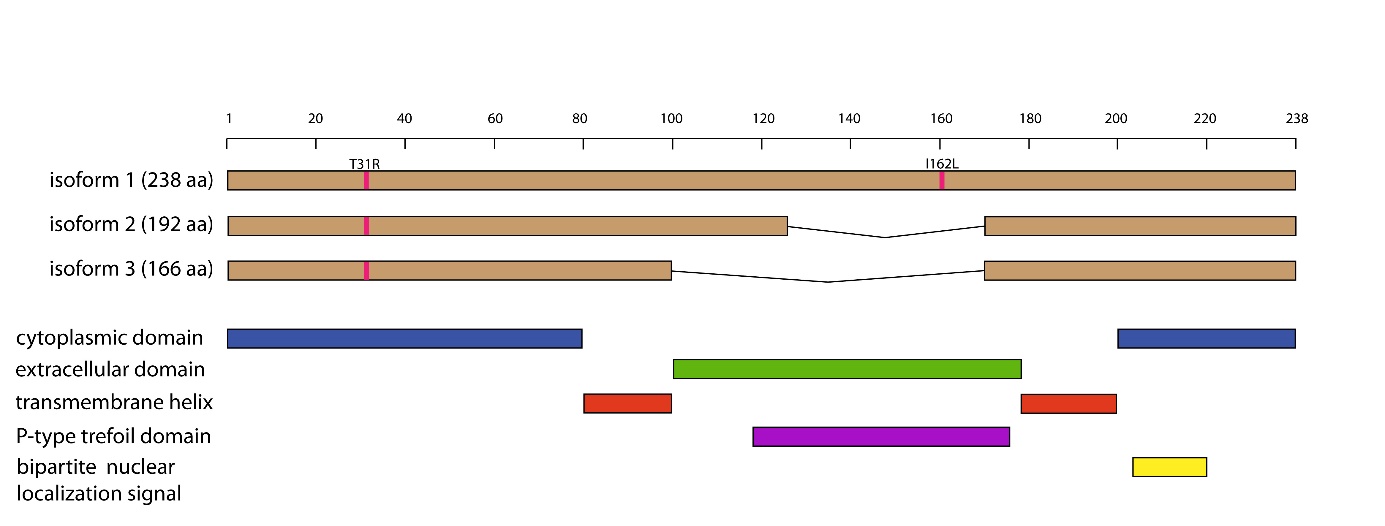
**

**Figure S3 FMR1NB protein domains and isoforms.** The predicted structure of the FMR1NB protein consists of two cytosolic N- and C-terminal domains, two transmembrane domains, and an extracellular part containing a P-type trefoil domain. Three isoforms of FMR1NB protein (Q80ZA7, UniProt) hold 238, 192 and 166 amino acids, respectively. The PWD and B6 allelic variants FMR1NB differ in two nonsynonymous substitutions: 31 ArgininePWD / ThreonineB6 and 162 LeucinePWD/IsoleucineB6. The polymorphic amino acids are highlighted in pink.
